# Supplementary material for: Facile growth of heparin-controlled porous polyaniline nanofiber networks and their application in supercapacitors
Source: Royal Society of Chemistry journal article supplement (doi:10.1039/c3ra45774e), 2014-01-01

## Supporting information

**Figure S1:** Cyclic Voltammogram (CV) of pure heparin

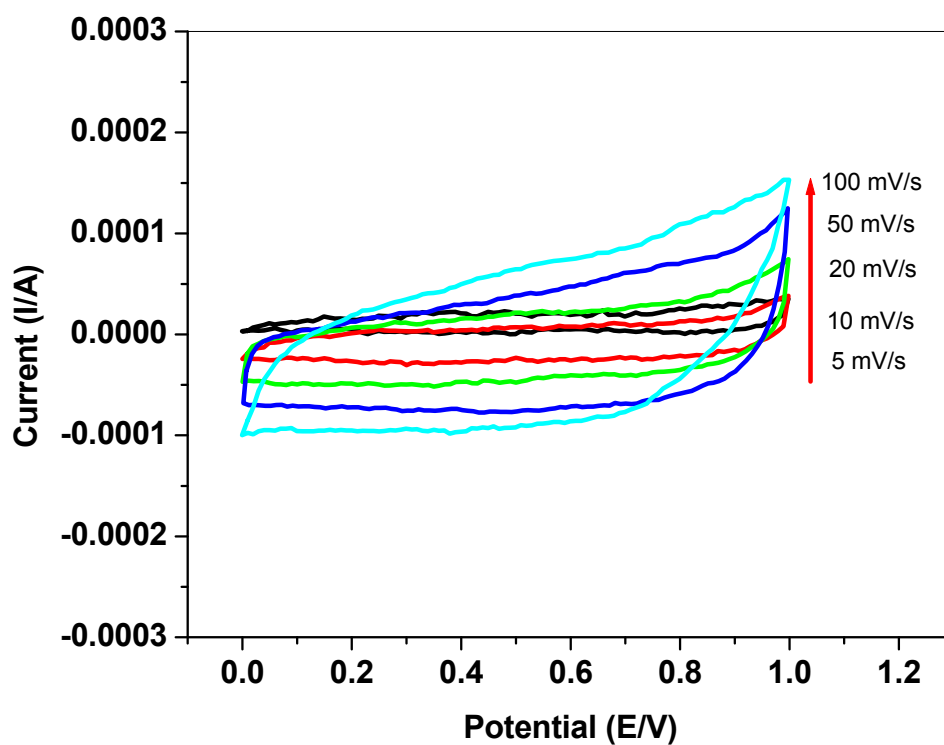

**Figure S2:** Thermogravimetric study of pure heparin

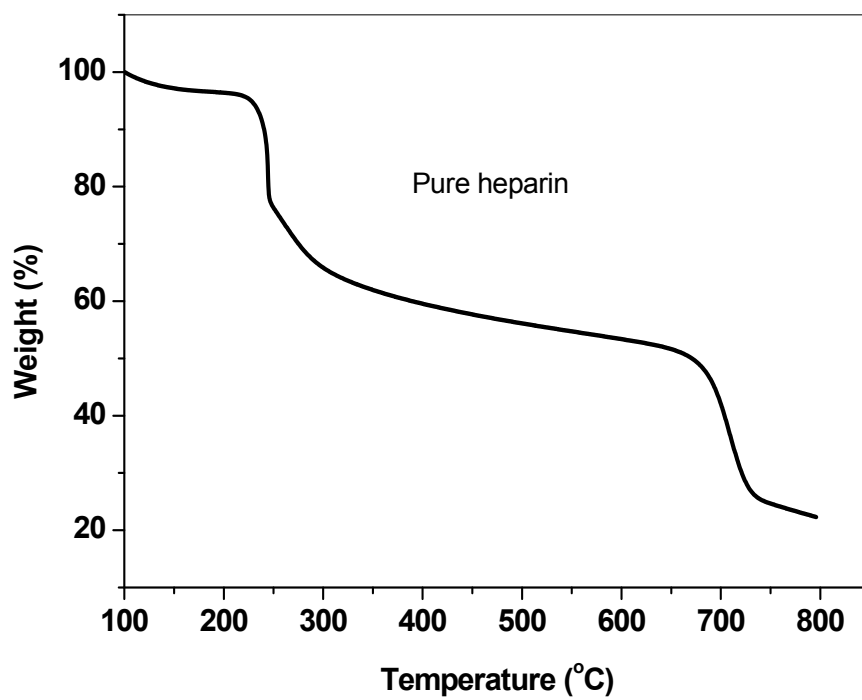

Supplement: c3ra45774e.pdf [file c3ra45774e.pdf]
